# Supplementary material
Source: ML conference proceedings conference paper supplement (https://openreview.net/forum?id=cpUuSV8kRw)
Supplement: supplementary_material [file attachment]

## A Execution of CoBRA in a Toy Example

incompletely assigned is also assigned to an agent that does not review it already. Hence, we see that until  $\bar{P}_i$  becomes empty, we have that  $|R_i^a| = \sum_{j \in [m^*]} |R_{p_{i,j}}^p|$ .

Next, we focus on the execution of Filling-Gaps. We know that any  $i \in N$  with  $\bar{P}_i \neq \emptyset$  is included in  $U$ . In the first phase, the algorithm eliminates cycles in the greedy graph. With similar arguments as in the elimination of cycles in the preference graph, we get that during and after the first phase of Filling-Gaps, it is still true that  $|R_i^a| = \sum_{j \in [m^*]} |R_{p_{i,j}}^p|$  for any  $i \in U$  with  $\bar{P}_i \neq \emptyset$ .  $\square$

Next, we need to show that Line 8 of PRA-TTC is valid which is true if  $|U| \leq k_p$ .

**Lemma 3.** *PRA-TTC returns  $|U| \leq k_p$ .*

*Proof.* For each  $i \in U$ , from Lemma 2, we know that

$$|R_i^a| = \sum_{j \in [m^*]} |R_{p_{i,j}}^p| < m^* \cdot k_p \leq k_a$$

where the first inequality follows since there exists at least one submission of  $i$  that is assigned to less than  $k_p$  agents. Hence, we get that each  $i \in U$  can review more submissions, when PRA-TTC terminates. Now, suppose for contradiction that at the last iteration of PRA-TTC, each agent  $i \in U$  has an outgoing edge in the preference graph. In this case, we claim that there exists a directed cycle in the preference graph which is a contradiction since PRA-TTC would not have been terminated yet. To see that, note that each outgoing edge of an agent  $i \in U$  either goes to another agent  $i' \in U$ , since  $i'$  can review more submissions, or goes to an agent  $i' \notin U$  whose all submissions are completely assigned. In the latter case,  $i'$  has an outgoing edge to an agent in  $U$  by the definition of the preference graph. Thus, starting from any agent in  $U$ , we conclude in an agent in  $U$  and eventually we would found a cycle. Therefore, we have that there exists an agent  $i^* \in U$  that at the last iteration of the algorithm arbitrary picks her incomplete submission  $p_{i^*, \ell^*}$  and does not have any outgoing edge to any other agent. This means that all the agents that can review more submissions, already review  $p_{i^*, \ell^*}$ . Since all the agents in  $U \setminus \{i^*\}$  can review more submissions, we get that all of them are assigned  $p_{i^*, \ell^*}$ . But since  $p_{i^*, \ell^*}$  is not completely assigned, we conclude that  $|U \setminus \{i^*\}| < k_p$ , which means that  $|U| \leq k_p$ .  $\square$

We proceed by showing that Lines 11- 12 of Filling-Gaps are valid.

**Lemma 4.** *When Fillings-Gaps enter the second phase with a non empty  $U$ , for each  $t \in [|U|]$  and for each  $p_{\rho(t), \ell} \in \bar{P}_{\rho(t)}$ , it exists a completely assigned submission  $p_{i', \ell'}$  with  $i' \in U \cup L \setminus \{\rho(t)\}$  that is not reviewed by  $\rho(t)$ , and it also exists an  $i'' \in N$  that reviews  $p_{i', \ell'}$ , but she does not review  $p_{\rho(t), \ell}$ .*

*Proof.* When  $U$  is non empty and no more cycles exists in the greedy graph, the algorithm constructs the topological order of the greedy graph, denoted by  $\vec{\rho}$ .

First, we show the following proposition.

**Proposition 1.** *For each  $t \in [|U|]$ ,  $\rho(t)$  reviews all the incompletely assigned submissions of each  $i \in U \setminus \{\rho(1), \dots, \rho(t-1), \rho(t)\}$ .*

*Proof.* Since  $\vec{\rho}$  is the topological ordering of the greedy graph, we have that no  $i \in U \setminus \{\rho(1), \dots, \rho(t-1), \rho(t)\}$  has an outgoing edge to  $\rho(t)$ . But from Lemma 2, we get that  $\rho(t)$  can review more submissions, since  $\rho(t)$  has submissions that are incompletely assigned which means that

$$\sum_{\ell \in [m^*]} |R_{p_{\rho(1), \ell}}^p| < k_p \cdot m^* \leq k_a.$$

Therefore, from the definition of the greedy graph, we get that  $\rho(t)$  reviews all the incompletely assigned submissions of each  $i$  in  $U \setminus \{\rho(1), \dots, \rho(t-1), \rho(t)\}$ .  $\square$

Next, we show by induction that for each  $t \in [|U|]$  as long as  $\bar{P}_{\rho(t)}$  is non-empty and it holds that  $|R_{\rho(t)}^a| = \sum_{\ell \in [m^*]} |R_{p_{\rho(t),\ell}}^p|$ , there exists a completely assigned submission  $p_{i',\ell'}$  of an agent  $i' \in U \cup L \setminus \{\rho(t)\}$  that is not reviewed by  $\rho(t)$ , and  $i'' \in N$  that reviews  $p_{i',\ell'}$  and does not review  $p_{\rho(t),\ell} \in \bar{P}_{\rho(t)}$ .

We start with  $t = 1$ . First, suppose for contradiction that  $\rho(1)$  reviews all the submissions of all the agents in  $U \cup L \setminus \{\rho(1)\}$ . Then, we would have that

$$|R_{\rho(1)}^a| = \sum_{\ell \in [m^*]} |R_{p_{\rho(1),\ell}}^p| = k_p \cdot m^*,$$

where the first equality follows from the assumption that  $|R_{\rho(1)}^a| = \sum_{\ell \in [m^*]} |R_{p_{\rho(1),\ell}}^p|$  and the second inequality follows from the facts that  $|U \cup L \setminus \{\rho(1)\}| = k_p$  and each agent has  $m^*$  submissions. But then we would conclude that all the submissions of  $\rho(1)$  are completely assigned since  $\rho(1)$  has  $m^*$  submissions and each of them should be assigned to  $k_p$  reviewers which is a contradiction. Moreover, from Proposition 1 we know that  $\rho(1)$  reviews all the incompletely assigned submissions that belongs to some agent  $i \in U \setminus \{\rho(1)\}$ . Hence, we get that since  $\rho(1)$  reviews all the incompletely assigned submissions but she cannot review all the submissions of all agents in  $i \in U \cup L \setminus \{\rho(1)\}$ , there exists a completely assigned submission  $p_{i',\ell'}$  that belongs to some  $i' \in U \cup L \setminus \{\rho(1)\}$  and is not reviewed by  $\rho(1)$ . In addition, since  $p_{i',\ell'}$  is reviewed by  $k_p$  agents and not from  $\rho(1)$ , while  $p_{\rho(1),\ell} \in \bar{P}_{\rho(1)}$  is reviewed by strictly less than  $k_p$  agents, it exists an agent  $i''$  that reviews the former submission but not the latter. It remains to show that during the execution of the 1-th iteration of the for loop in the second phase of Filling-Gaps, it holds that  $|R_{\rho(1)}^a| = \sum_{\ell \in [m^*]} |R_{p_{\rho(1),\ell}}^p|$ . Note that if every time that the algorithm enters the second while loop of the algorithm, this property is satisfied, then the property remains true at the end of this execution, since as we show above, in this case there are  $p_{i',\ell'}$  and  $i''$  with the desired properties, and therefore one incompletely assigned submission of  $\rho(1)$  is assigned to a new reviewer and concurrently  $\rho(1)$  is assigned a new submission to review. We get that  $|R_{\rho(1)}^a| = \sum_{\ell \in [m^*]} |R_{p_{\rho(1),\ell}}^p|$  is true during the execution of the 1-st iteration of the for loop by noticing that from Lemma 2, we know that this is true when we first enter the while loop of the second phase.

Suppose that the hypothesis holds for  $t - 1$ . Note that from the base case and the hypothesis, at iteration  $t$ , all the submissions of each agent in  $i' \in L \cup \{\rho(1), \dots, \rho(t-1)\}$  are completely assigned. Thus, any incompletely assigned submission, that does not belong to  $\rho(t)$ , belongs to some agent  $i \in U \setminus \{\rho(1), \dots, \rho(t-1), \rho(t)\}$ . But, from Proposition 1 we already know that  $\rho(t)$  reviews any such submission. Moreover, we note that  $\rho(t)$  cannot review all the submissions of all the agents in  $U \cup L \setminus \{\rho(t)\}$ . Indeed, if we assume for contradiction that  $\rho(t)$  reviews all the submissions of all the agents in  $U \cup L \setminus \{\rho(t)\}$ , then we have that

$$|R_{\rho(t)}^a| = \sum_{\ell \in [m^*]} |R_{p_{\rho(t),\ell}}^p| = k_p \cdot m^*,$$

where the first inequality follows from the assumption that  $|R_{\rho(t)}^a| = \sum_{\ell \in [m^*]} |R_{p_{\rho(t),\ell}}^p|$  and the second follows from the facts that  $|U \cup L \setminus \{\rho(t)\}| = k_p$  and each of them has  $m^*$  submissions, which would imply that all the submissions of  $\rho(t)$  are completely assigned. Hence, we get that since  $\rho(t)$  reviews all the incompletely assigned submissions but cannot review all the submissions of all agents in  $i \in U \cup L \setminus \{\rho(t)\}$ , there exists a completely assigned submission that belongs to some  $i' \in U \cup L \setminus \{\rho(t)\}$  and is not reviewed by  $\rho(t)$ . Moreover, we show that there exists  $i''$  that reviews  $p_{i',\ell'}$ , but does not review  $p_{\rho(t),\ell} \in \bar{P}_{\rho(t)}$ . Indeed, since  $p_{i',\ell'}$  is reviewed by  $k_p$  agents and not from  $\rho(t)$ , while  $p_{\rho(t),\ell}$  is reviewed by strictly less than  $k_p$  agents, it exists an agent that reviews the former submission but not the latter. It remains to show that during the execution of the  $t$ -th iteration of the for loop in the second phase of Filling-Gaps, it holds that  $|R_{\rho(t)}^a| = \sum_{\ell \in [m^*]} |R_{p_{\rho(t),\ell}}^p|$ . Note that if when we first enter the while loop of the  $t$ -th iteration it is indeed true that  $|R_{\rho(t)}^a| = \sum_{\ell \in [m^*]} |R_{p_{\rho(t),\ell}}^p|$ , then during the whole execution of the while loop this property remains true, since as we show above, in this case there are  $p_{i',\ell'}$  and  $i''$  with the desired properties. From Lemma 2, we know that this is true when we enter the second phase of Filling-Gaps. Before, round  $t$ , if  $\rho(t)$  is assigned a new submission to review, she is removed one of the old assigned submissions, while none of her incompletely assigned submissions is assigned to any agent. Hence, indeed we have the desired property, when we first enter the  $t$ -th round.  $\square$

| Dataset  | Alg   | USW   | ESW   |
|----------|-------|-------|-------|
| CVPR '17 | CoBRA | 1.644 | 0.000 |
|          | TPMS  | 1.970 | 0.000 |
|          | PR4A  | 1.919 | 0.384 |
| CVPR '18 | CoBRA | 1.208 | 0.000 |
|          | TPMS  | 1.586 | 0.004 |
|          | PR4A  | 1.560 | 0.731 |
| ICLR '18 | CoBRA | 0.251 | 0.015 |
|          | TPMS  | 0.284 | 0.038 |
|          | PR4A  | 0.278 | 0.086 |

Table 2: USW and ESW without subsampling on CVPR 2017 and 2018, and ICLR 2018.

We partition the agents in  $N$ , into two parts  $N_1$  and  $N_2$ , where  $N_1$  contains all the agents that do not belong in  $U$  that PRA-TTC returns and  $N_2 = N \setminus N_1$ . We proceed by separately showing that the assignment that CoBRA returns is valid over the agents in  $N_1$  and over the agent in  $N_2$ .

**Valid Assignment over the agents in  $N_1$ .** Note that in PRA-TTC, each submission is assigned to at most  $k_p$  reviewers and therefore, during the execution of PRA-TTC, for each  $i \in N$ , it holds that  $\sum_{j \in [m^*]} |R_{p_i,j}^p| \leq k_p \cdot m^*$ . From Lemma 2, since  $k_p \cdot m \leq k_a$ , we get that in PRA-TTC, each  $i \in N_1$  is not assigned more than  $k_a$  papers to review until the point where all of her submissions become completely assigned. After that point, an agent may still participate in a cycle as long as she reviews strictly less than  $k_a$  submissions. Therefore, when we exit PRA-TTC, each agent in  $N_1$  does not review more than  $k_a$  submissions and all her submissions are completely assigned. In Filling-Gaps, from Lemma 4, we get that if an agent in  $N_1$  is assigned a new submission to review, she is removed one of the submissions that she already reviews. Moreover, the assignments of submissions that belong to agents in  $N_1$  do not change. Hence, we can conclude that the assignment that CoBRA returns is valid with respect to the agents in  $N_1$ .

**Valid Assignment over the agents in  $N_2$ .** From Lemma 2, we get that during the execution of PRA-TTC each agent  $i$  that is included in  $U$  that PRA-TTC returns reviews less than  $k_a$  submissions, since some of her submissions are not completely assigned (which means that  $\sum_{\ell \in [m^*]} |R_{p_i,\ell}^p| < k_p \cdot m^*$ ). From the same lemma, we have that after the execution of the first phase of Filling-Gaps, it holds that  $|R_i^a| = \sum_{\ell \in [m^*]} |R_{p_i,\ell}^p|$ . Next, we show that this property remains true after the second phase of Filling-Gaps. Indeed, from Lemma 4, we have that during the second phase of Filling-Gaps, if  $i \in U$  is assigned a new submission to review without one of her incompletely assigned submissions is assigned to a new reviewer, she is removed one of her assigned submissions; on the other hand, if one of her incompletely assigned submissions is assigned to a new reviewer, she is also assigned to review a new submission. Lastly, from Lemma 4, we conclude that in the second phase of Filling-Gaps, all the submissions become eventually completely assigned since in each iteration of the while loop, an incompletely assigned submission is assigned to one more reviewer. Therefore in the assignment that Filling-Gaps returns, no agent in  $N_2$  reviews more than  $k_a$  submissions and all the submissions of the agents in  $N_2$  are completely assigned, which means that the assignment is valid with respect to the agents in  $N_2$  as well.  $\square$

## C Supplementary Experiments

In Section 4, we show that TPMS and PR4A often motivate group of authors to deviate and redistribute their submissions among themselves. The size of a deviating groups is also an interesting measure, for evaluating if such a group indeed consists a distinct subcommunity of researchers that has incentives to build its own conference rather than an extremely tiny group of authors that could locally benefit by exchanging their papers for reviewing. In Table 3, we can see the maximum size of a successfully deviating coalition, averaged across 100 runs, together with the standard error. As before, each run is a subsampled dataset of size 100, so these can be interpreted as percentages. It seems that under both TPMS and PR4A across all three datasets, the largest deviating communities are 6-15% of the conference size, which we can indeed reflect the sizes of some of the largest subcommunities at

| Dataset  | Alg  | Largest Deviating Group |
|----------|------|-------------------------|
| CVPR '17 | TPMS | $6.64 \pm 0.77$         |
|          | PR4A | $7.50 \pm 0.77$         |
| CVPR '18 | TPMS | $10.54 \pm 1.29$        |
|          | PR4A | $11.49 \pm 1.49$        |
| ICLR '18 | TPMS | $11.25 \pm 1.76$        |
|          | PR4A | $15.01 \pm 1.76$        |

Table 3: Largest Size of Deviating Group on CVPR 2017 and 2018, and ICLR 2018.

CVPR and ICLR. Of course, there are deviating groups with smaller size as well which can consist smaller communities.
